# Supplementary material
Source: HighWire-hosted journal article supplement (http://www.qdcxjkg.com/highwire/filestream/113664/field_highwire_adjunct_files/0/ERJ-00525-2012_Disclosures.pdf)
Supplement: ERJ-00525-2012_Disclosures.pdf [file ERJ-00525-2012_Disclosures.pdf]

**T. Gislason** has received funding for research from unrestricted educational grants from GlaxoSmithKline and AstraZeneca. He has also participated in COPD workshops funded by Pfizer, Novartis, AstraZenica and GlaxoSmithKline.
